# Supplementary material for: Efficient one-step synthesis of diarylacetic acids by electrochemical direct carboxylation of diarylmethanol compounds in DMSO
Source: publisher site journal article supplement (doi:10.3762/bjoc.20.203), 2024-09-20
Supplement: Additional file 1 [file 1860-5397-20-203-S1.pdf]

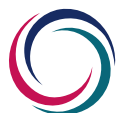

## Supporting Information

for

### **Efficient one-step synthesis of diarylacetic acids by electrochemical direct carboxylation of diarylmethanol compounds in DMSO**

Hisanori Senboku and Mizuki Hayama

*Beilstein J. Org. Chem.* **2024**, *20*, 2392–2400. [doi:10.3762/bjoc.20.203](https://doi.org/10.3762/bjoc.20.203)

## NMR spectra

## Table of Contents:

|                                                                          |     |
|--------------------------------------------------------------------------|-----|
| 1. $^1\text{H}$ and $^{13}\text{C}$ Spectra of compound <b>2a</b> .....  | S2  |
| 2. $^1\text{H}$ and $^{13}\text{C}$ Spectra of compound <b>2d</b> .....  | S4  |
| 3. $^1\text{H}$ and $^{13}\text{C}$ Spectra of compound <b>2e</b> .....  | S6  |
| 4. $^1\text{H}$ and $^{13}\text{C}$ Spectra of compound <b>2f</b> .....  | S8  |
| 5. $^1\text{H}$ and $^{13}\text{C}$ Spectra of compound <b>2g</b> .....  | S10 |
| 6. $^1\text{H}$ and $^{13}\text{C}$ Spectra of compound <b>2h</b> .....  | S12 |
| 7. $^1\text{H}$ and $^{13}\text{C}$ Spectra of compound <b>2i</b> .....  | S14 |
| 8. $^1\text{H}$ and $^{13}\text{C}$ Spectra of compound <b>2j</b> .....  | S16 |
| 9. $^1\text{H}$ and $^{13}\text{C}$ Spectra of compound <b>2k</b> .....  | S18 |
| 10. $^1\text{H}$ and $^{13}\text{C}$ Spectra of compound <b>2l</b> ..... | S20 |

# 1. $^1\text{H}$ and $^{13}\text{C}$ spectra of compound 2a.

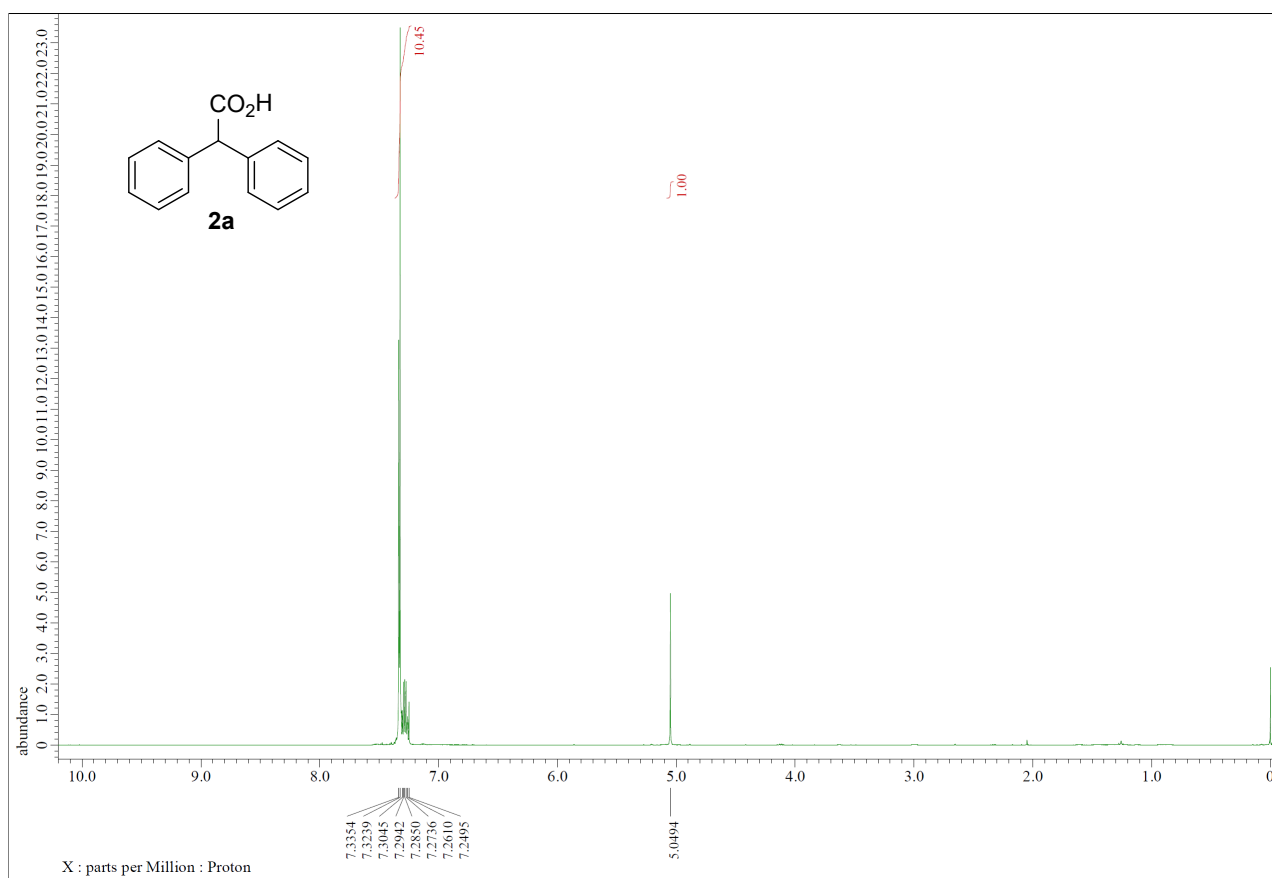

Fig. 1.  $^1\text{H}$  NMR (400 MHz;  $\text{CDCl}_3$ ) spectrum of diphenylacetic acid (2a).

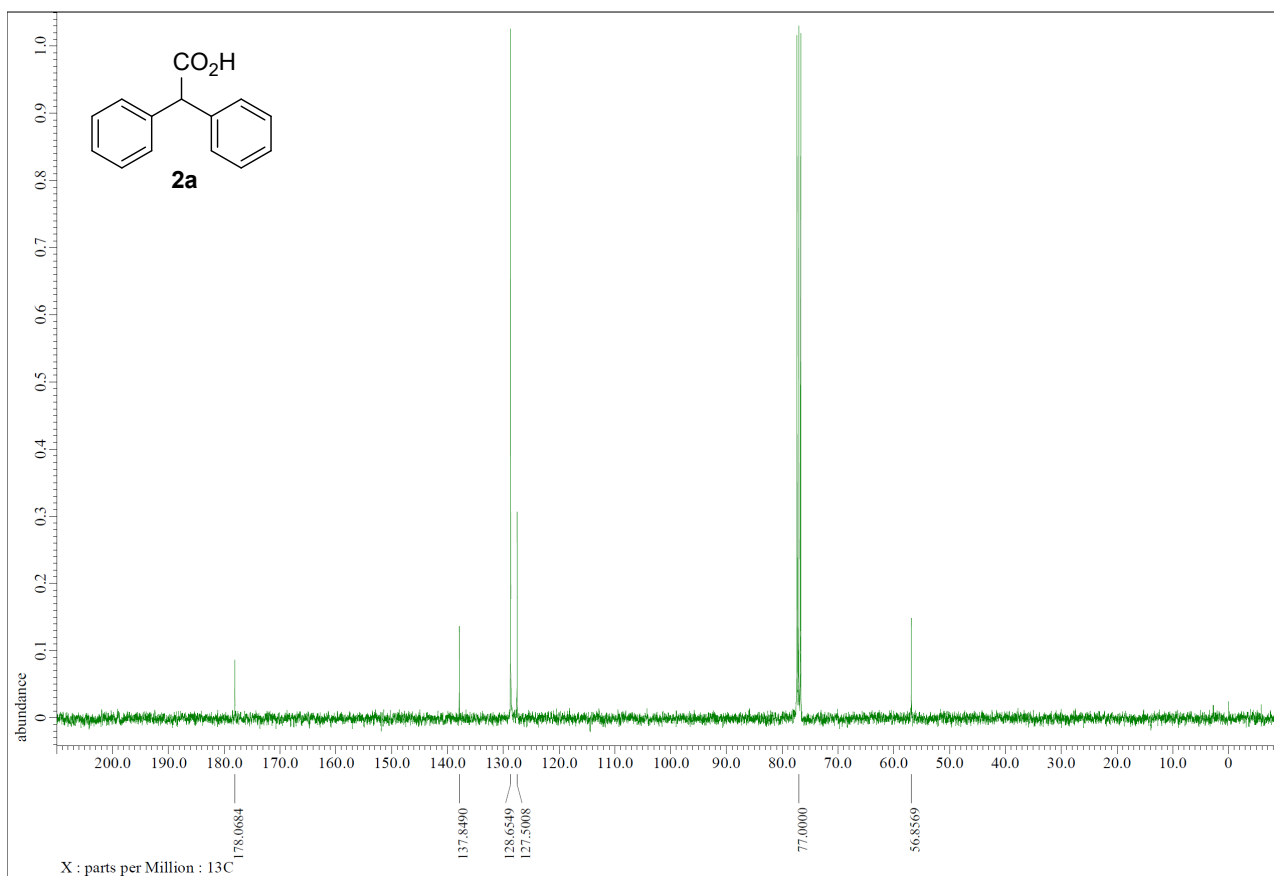

Fig. 2.  $^{13}\text{C}$  NMR (100 MHz;  $\text{CDCl}_3$ ) spectrum of diphenylacetic acid (**2a**).

## 2. $^1\text{H}$ and $^{13}\text{C}$ spectra of compound **2d**.

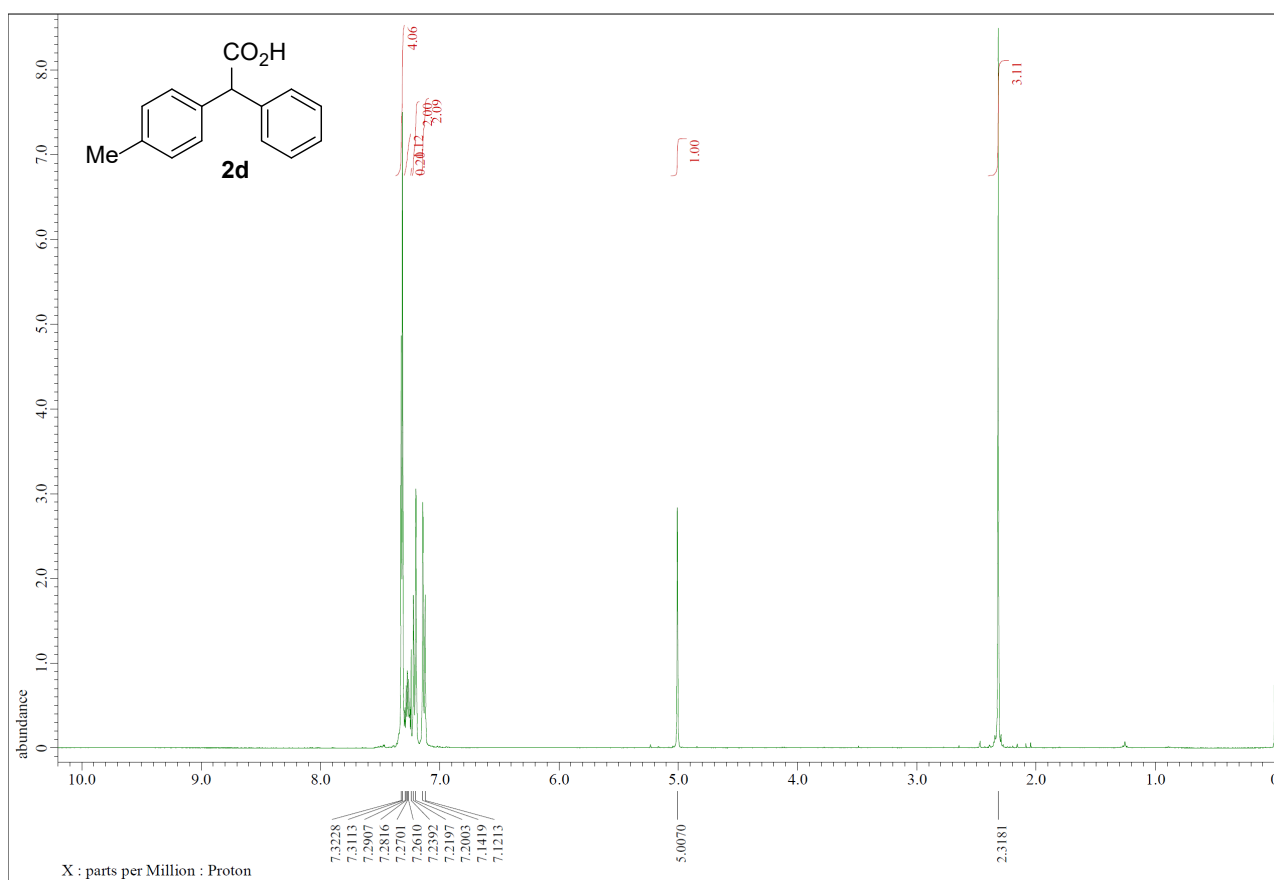

Fig. 3.  $^1\text{H}$  NMR (400 MHz;  $\text{CDCl}_3$ ) spectrum of (4-methylphenyl)phenylacetic acid (**2d**).

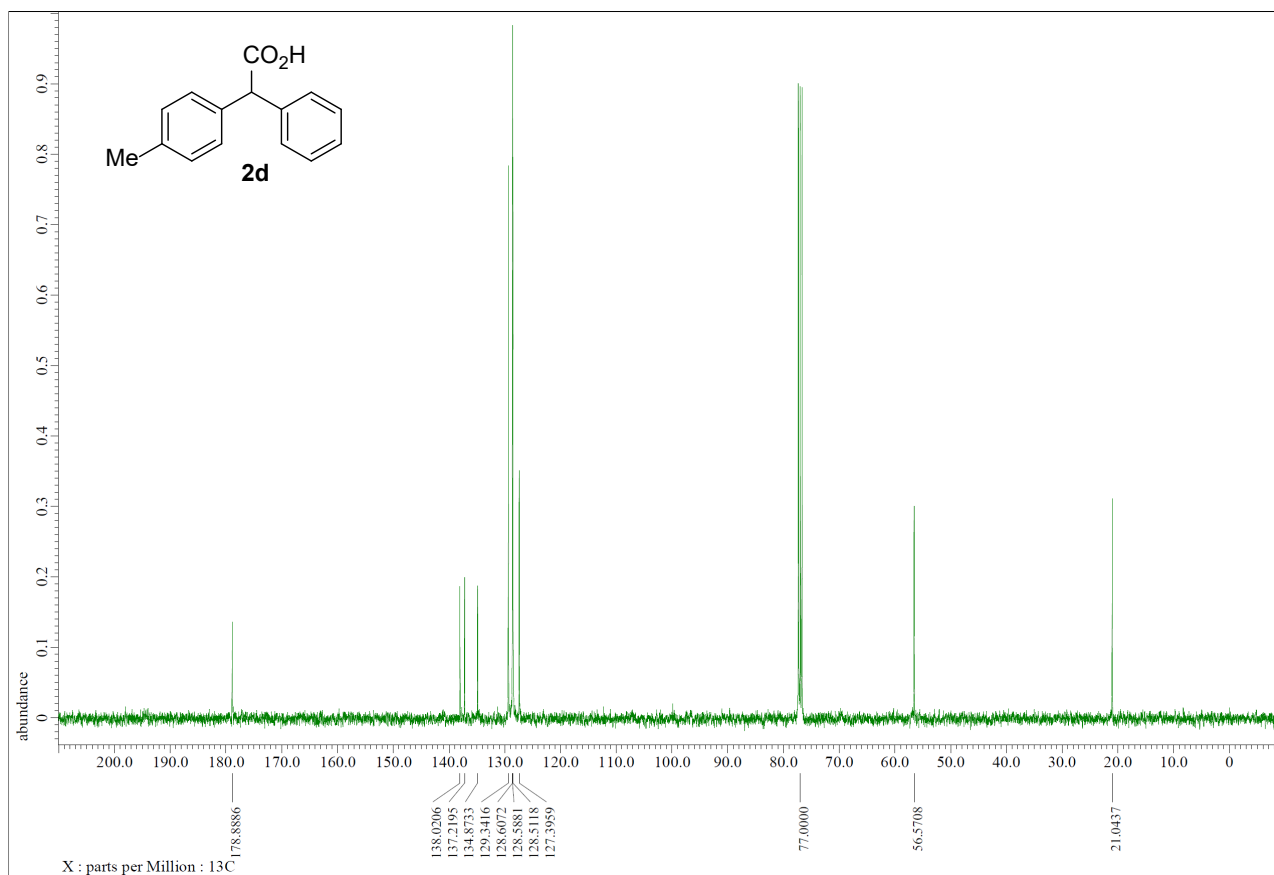

Fig. 4.  $^{13}\text{C}$  NMR (100 MHz;  $\text{CDCl}_3$ ) spectrum of (4-methylphenyl)phenylacetic acid (**2d**).

### 3. $^1\text{H}$ and $^{13}\text{C}$ spectra of compound **2e**.

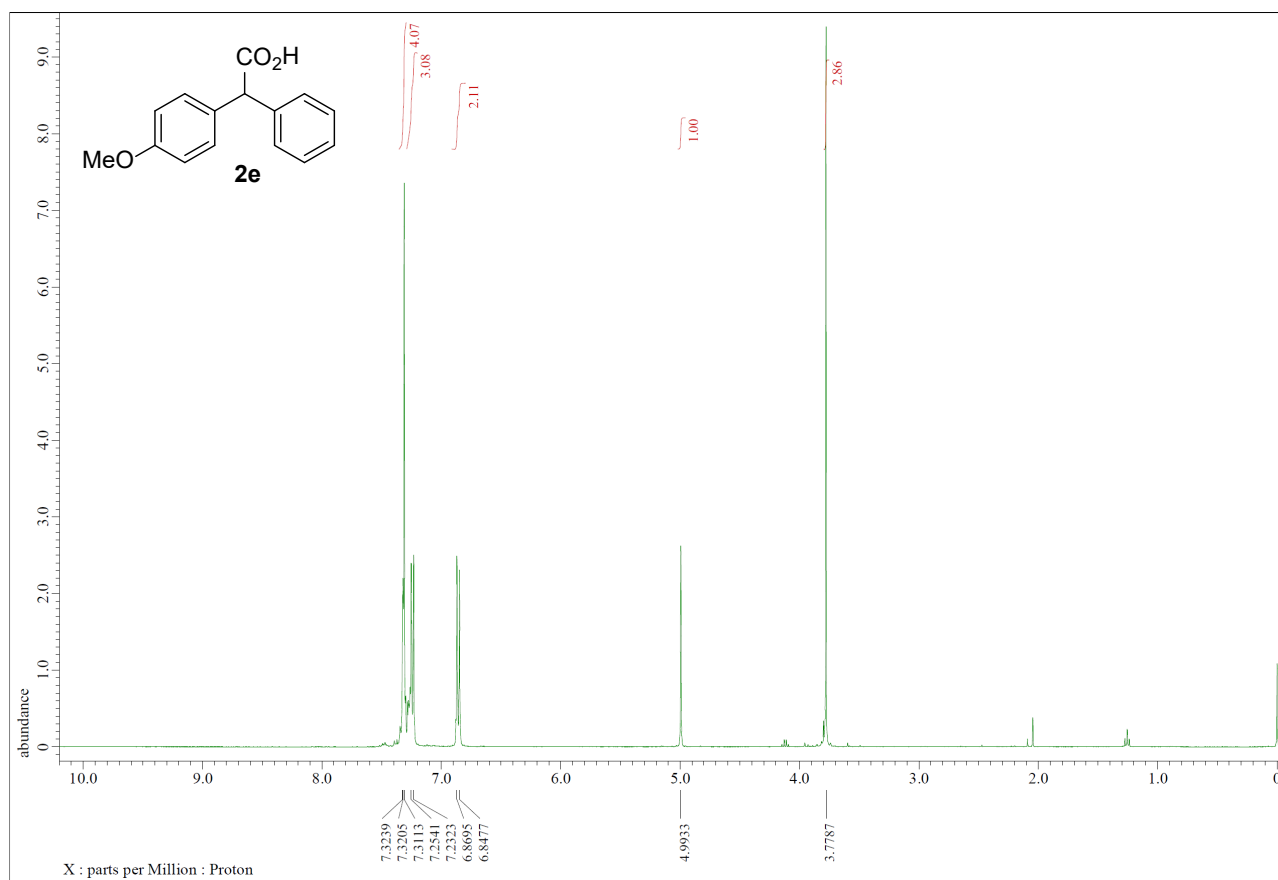

Fig. 5.  $^1\text{H}$  NMR (400 MHz;  $\text{CDCl}_3$ ) spectrum of (4-methoxyphenyl)phenylacetic acid (**2e**).

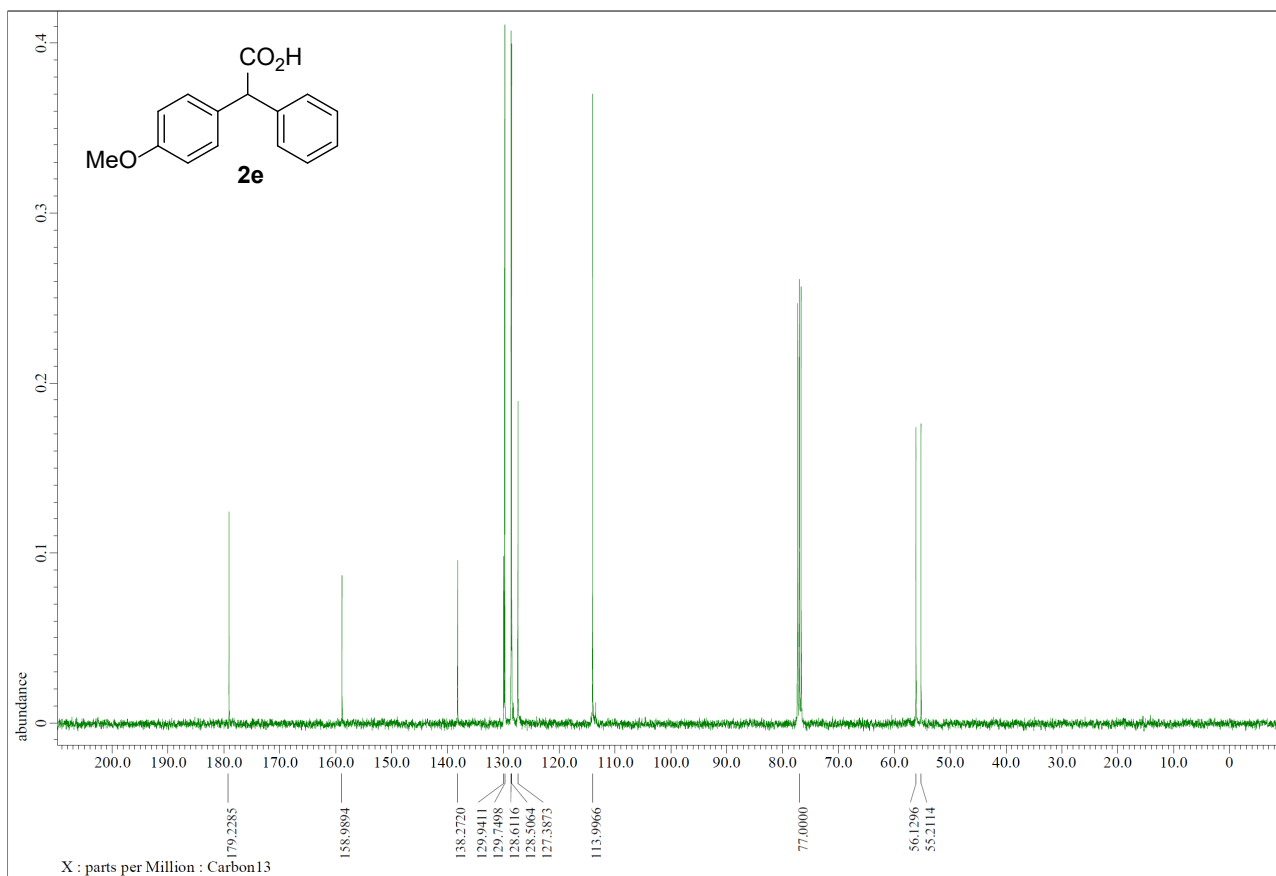

Fig. 6.  $^{13}\text{C}$  NMR (100 MHz;  $\text{CDCl}_3$ ) spectrum of (4-methoxyphenyl)phenylacetic acid (**2e**).



#### 4. $^1\text{H}$ and $^{13}\text{C}$ spectra of compound **2f**.

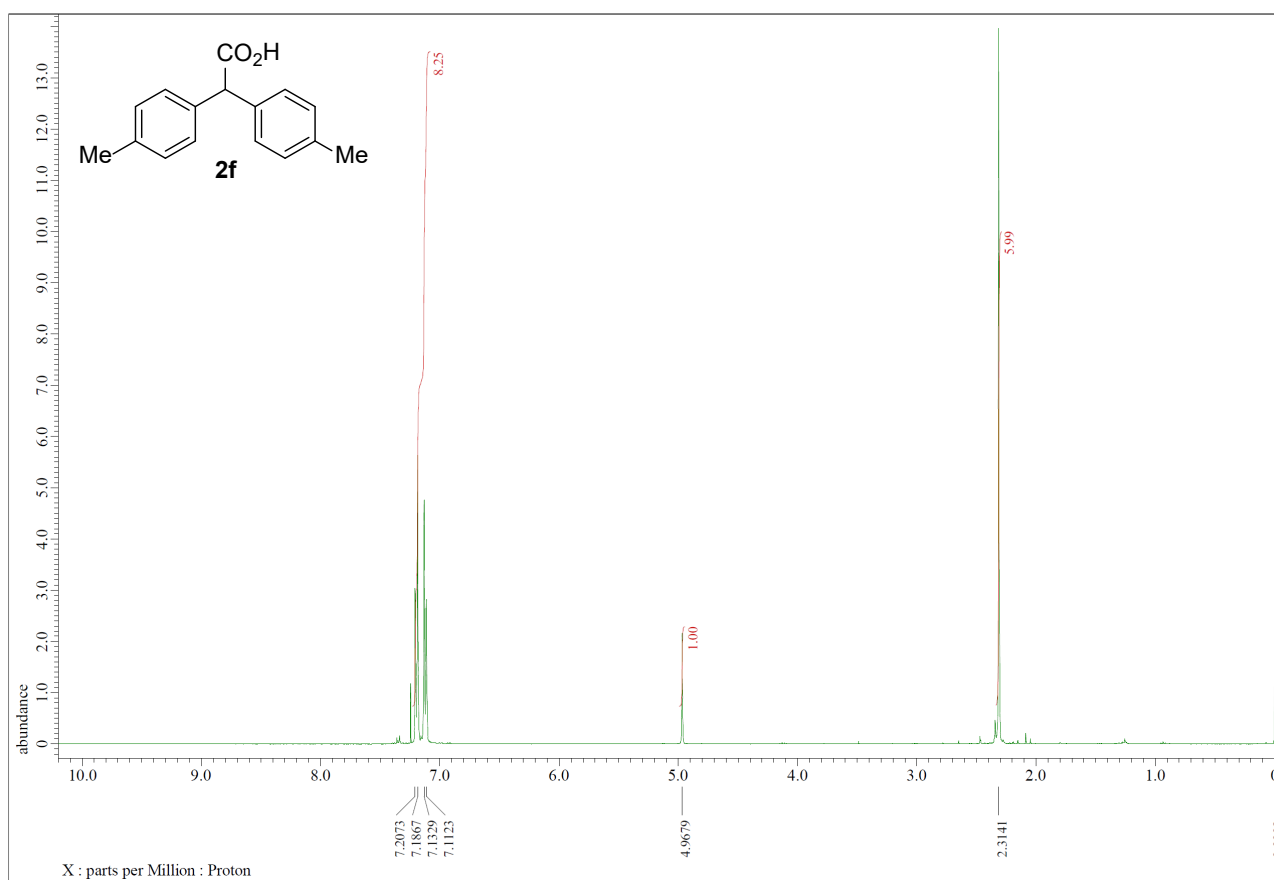

Fig. 7.  $^1\text{H}$  NMR (400 MHz;  $\text{CDCl}_3$ ) spectrum of bis(4-methylphenyl)acetic acid (**2f**).

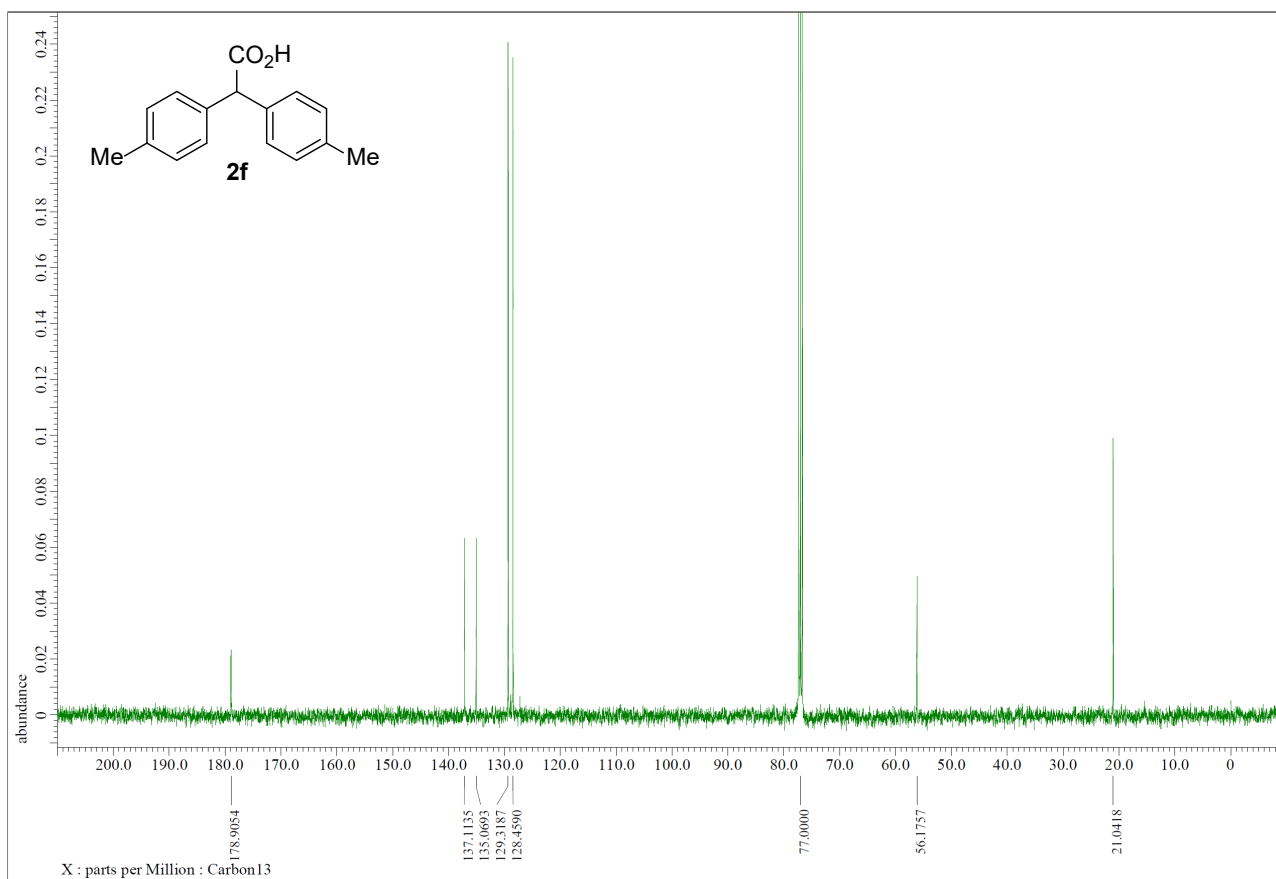

Fig. 8. <sup>13</sup>C NMR (100 MHz; CDCl<sub>3</sub>) spectrum of bis(4-methylphenyl)acetic acid (**2f**).

## 5. $^1\text{H}$ and $^{13}\text{C}$ spectra of compound **2g**.

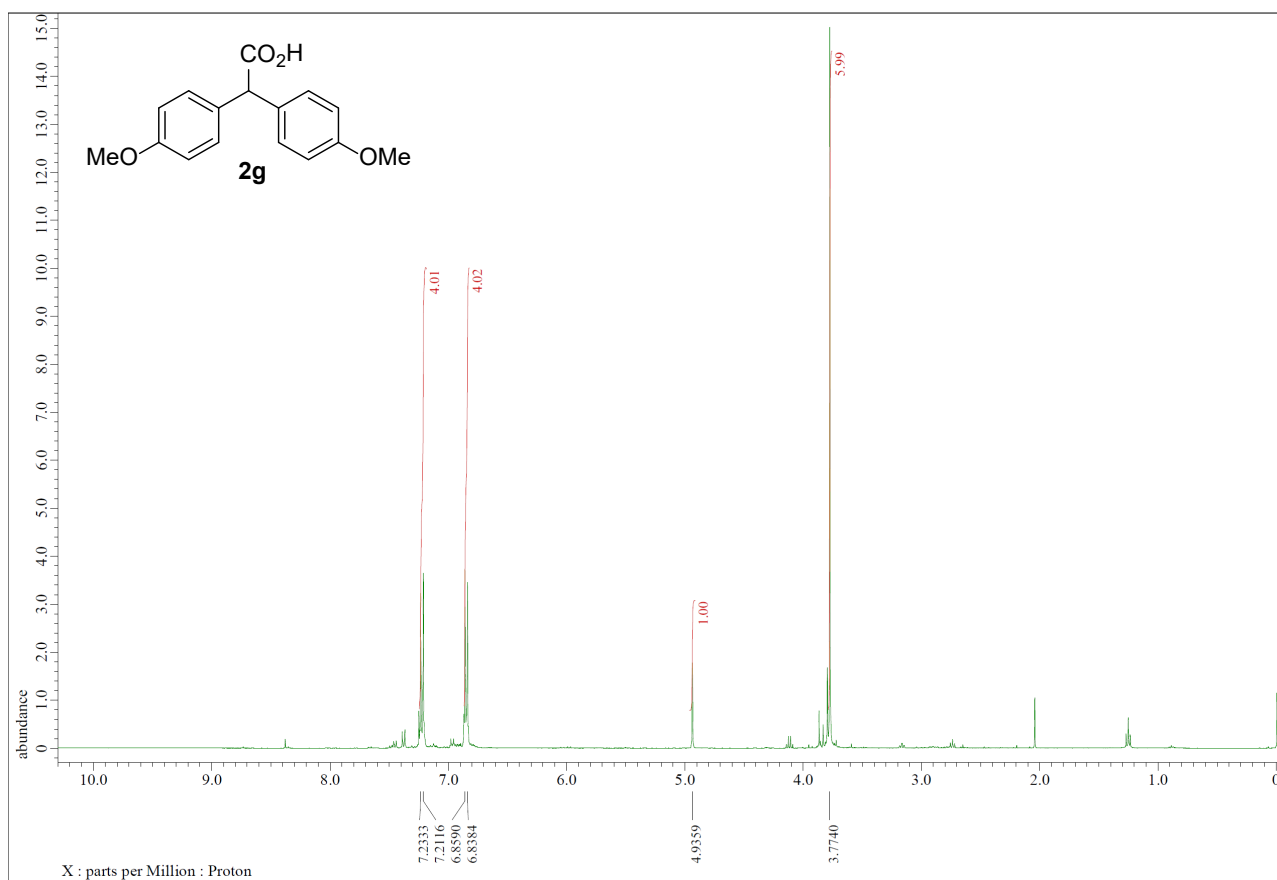

Fig. 9.  $^1\text{H}$  NMR (400 MHz;  $\text{CDCl}_3$ ) spectrum of bis(4-methoxyphenyl)acetic acid (**2g**).

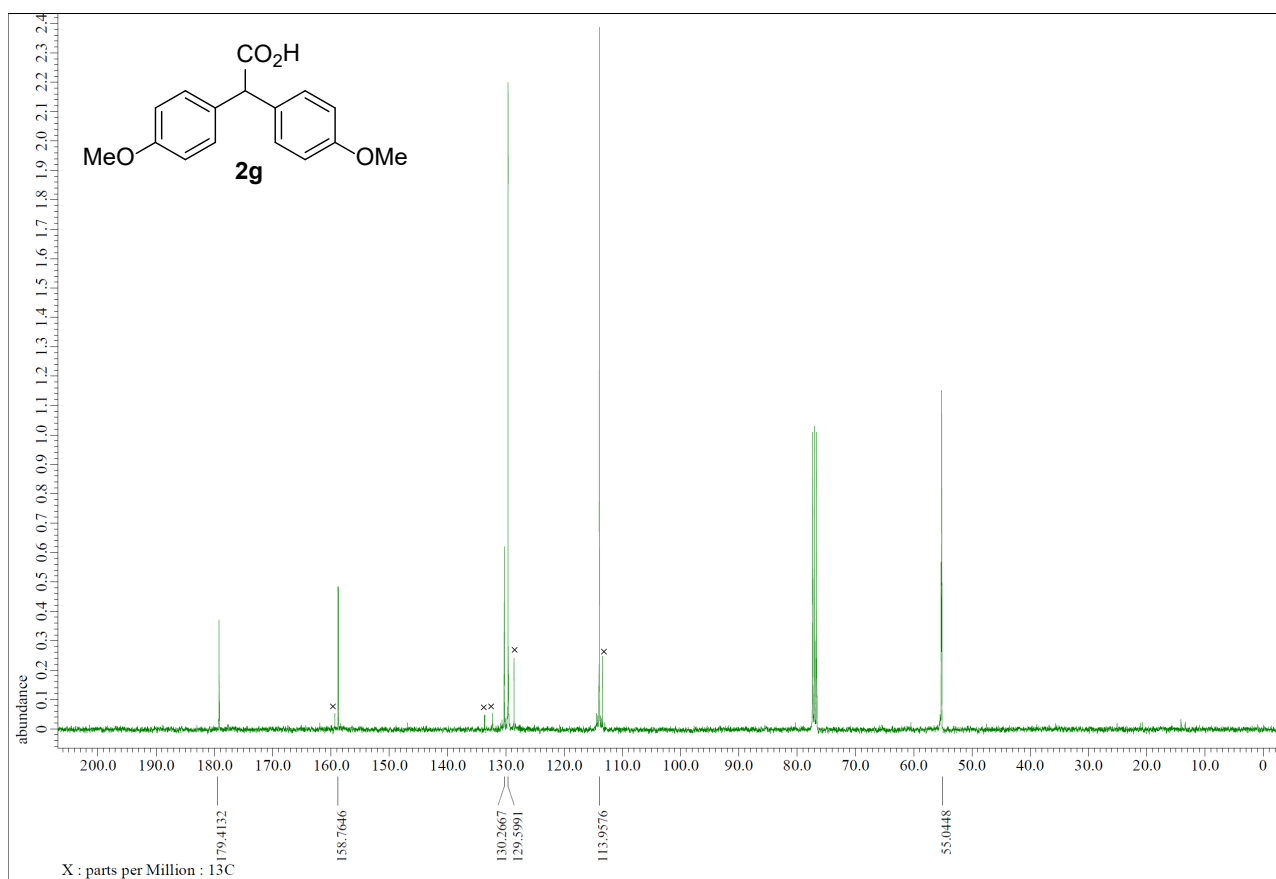

Fig. 10.  $^{13}\text{C}$  NMR (100 MHz;  $\text{CDCl}_3$ ) spectrum of bis(4-methoxyphenyl)acetic acid (**2g**).

## 6. $^1\text{H}$ and $^{13}\text{C}$ spectra of compound **2h**.

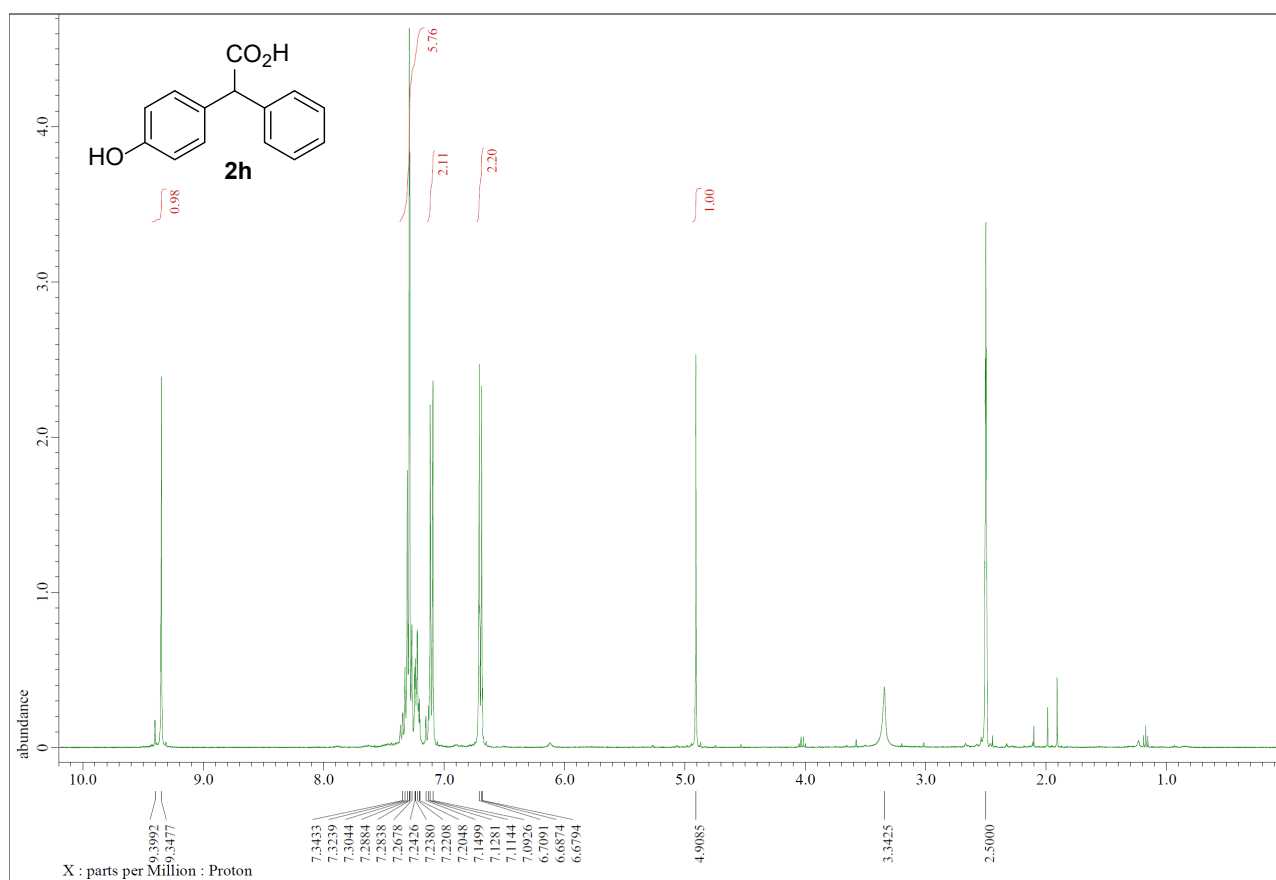

Fig. 11.  $^1\text{H}$  NMR (400 MHz; DMSO- $d_6$ ) spectrum of (4-hydroxyphenyl)phenylacetic acid (**2h**).

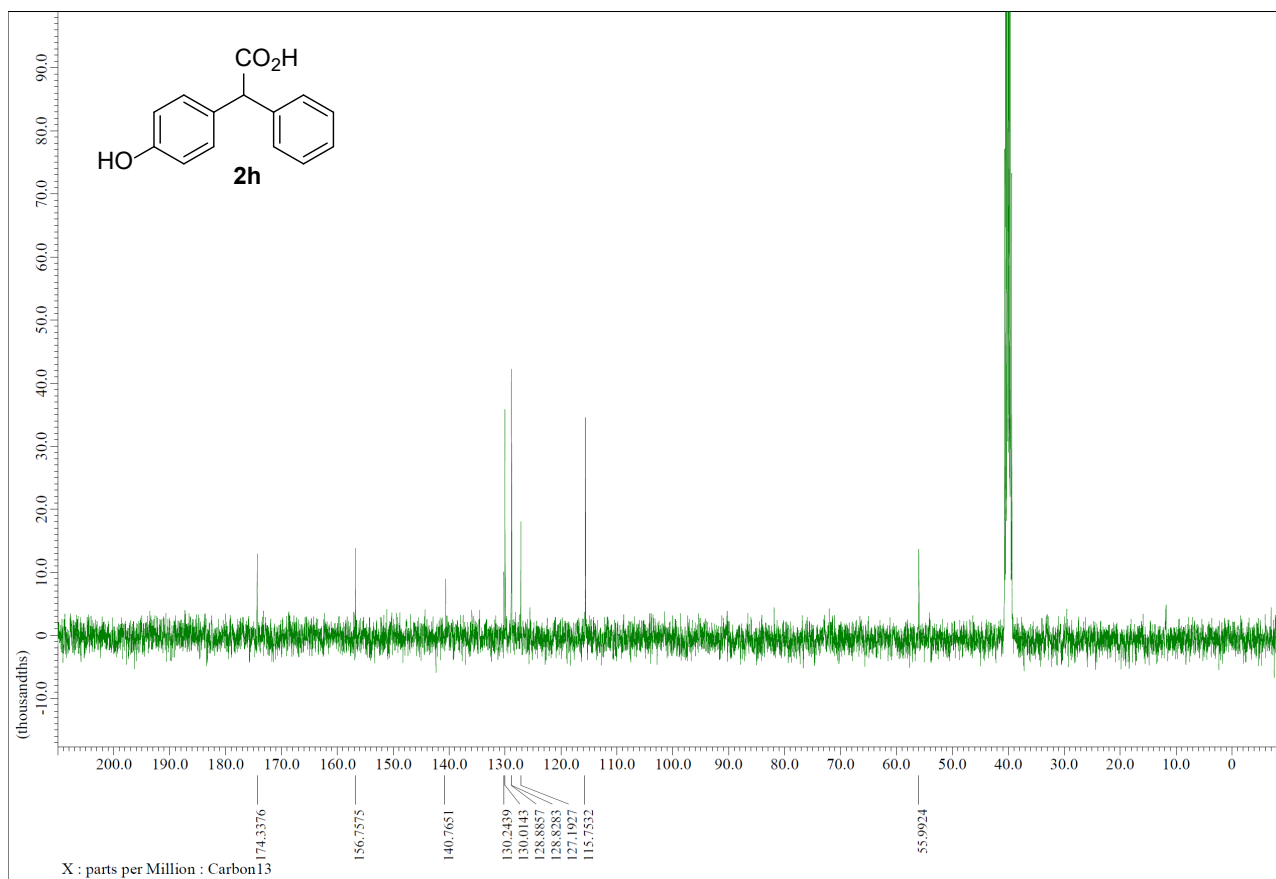

Fig. 12.  $^{13}\text{C}$  NMR (100 MHz; DMSO- $d_6$ ) spectrum of (4-hydroxyphenyl)phenylacetic acid (**2h**).

## 7. $^1\text{H}$ and $^{13}\text{C}$ spectra of compound **2i**.

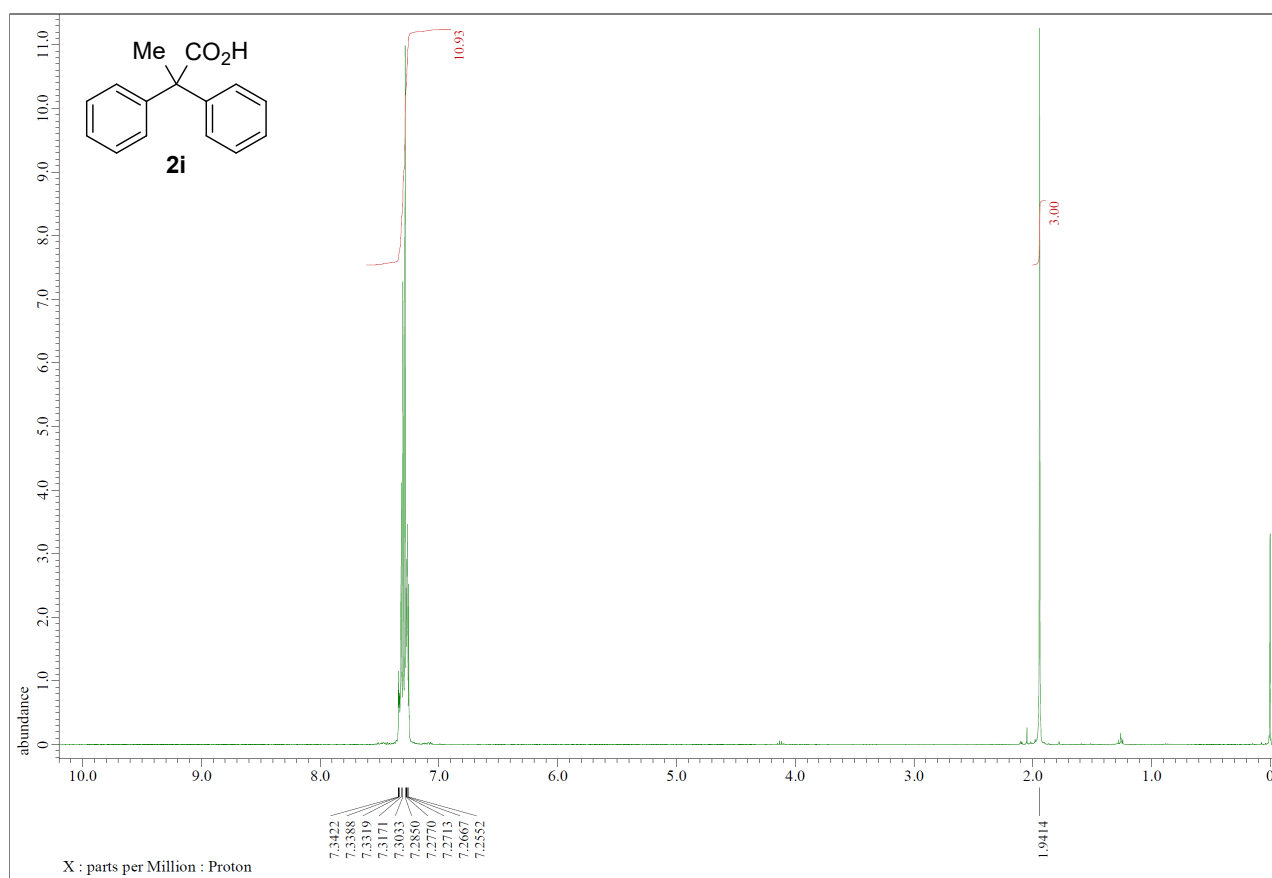

Fig. 13.  $^1\text{H}$  NMR (400 MHz;  $\text{CDCl}_3$ ) spectrum of 2,2-diphenylpropanoic acid (**2i**).

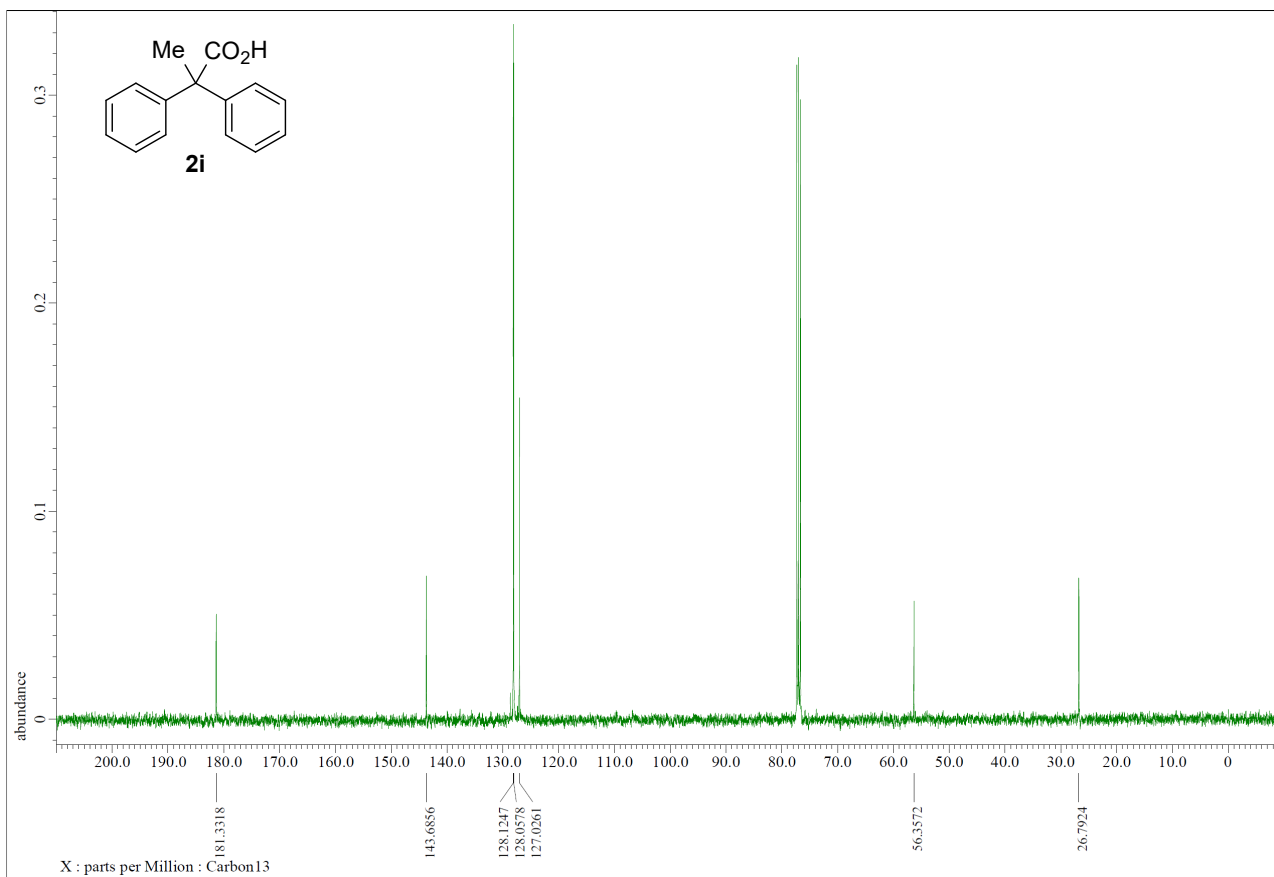

Fig. 14.  $^{13}\text{C}$  NMR (100 MHz;  $\text{CDCl}_3$ ) spectrum of 2,2-diphenylpropanoic acid (**2i**).



## 8. $^1\text{H}$ and $^{13}\text{C}$ spectra of compound **2j**.

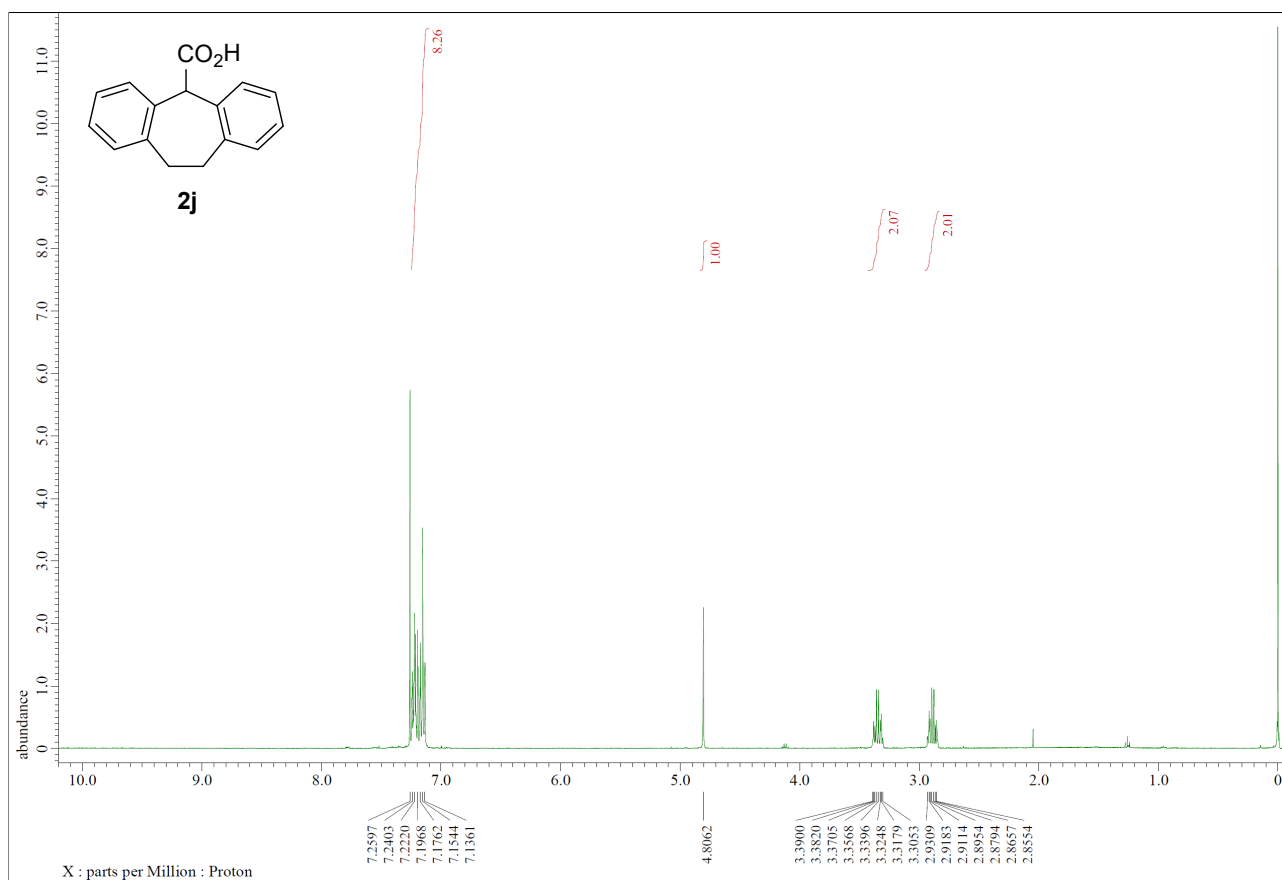

Fig. 15.  $^1\text{H}$  NMR (400 MHz;  $\text{CDCl}_3$ ) spectrum of 10,11-dihydro-5H-dibenzo[a,d]cycloheptene-5-carboxylic acid (**2j**).

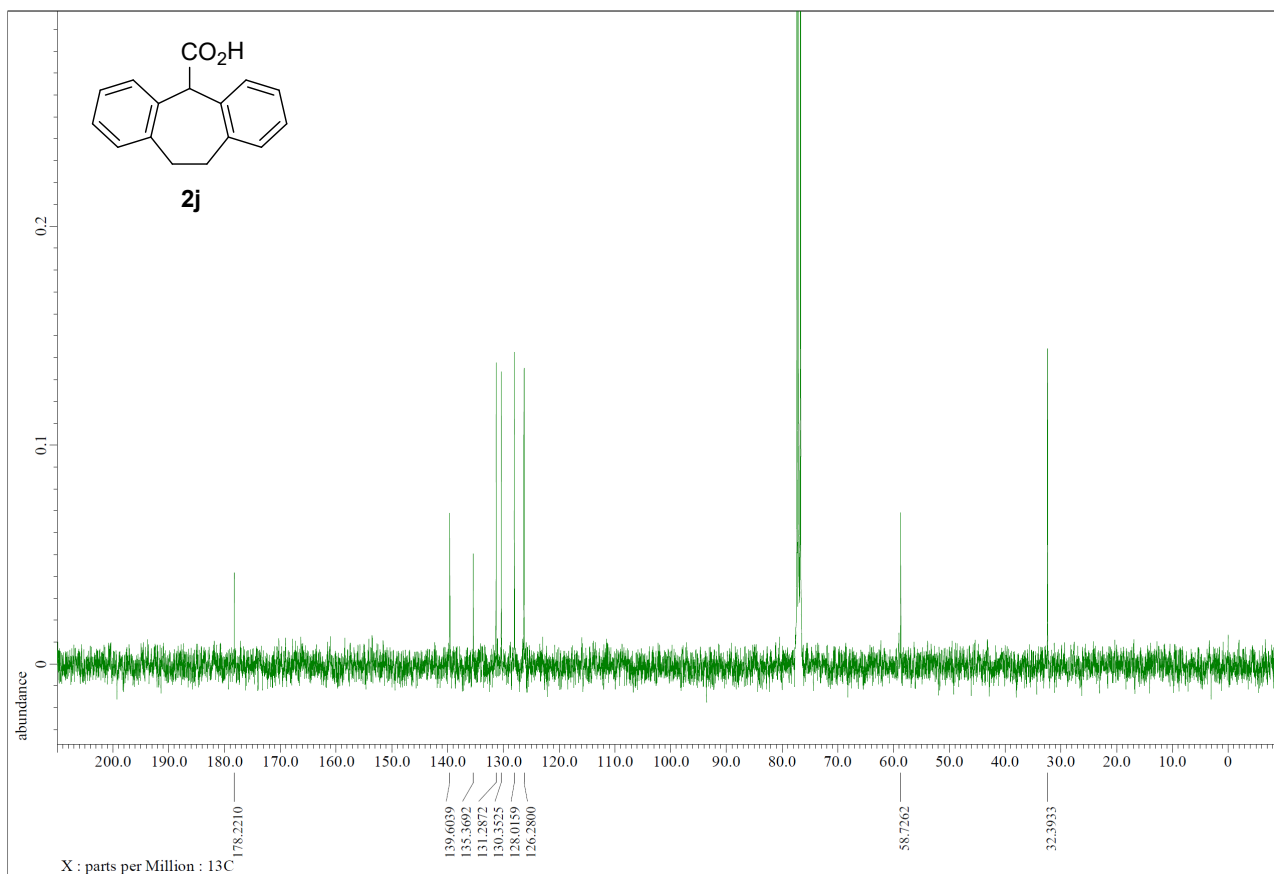

Fig. 16. <sup>13</sup>C NMR (100 MHz; CDCl<sub>3</sub>) spectrum of 10,11-dihydro-5H-dibenzo[a,d]cycloheptene-5-carboxylic acid (**2j**).

## 9. $^1\text{H}$ and $^{13}\text{C}$ spectra of compound **2k**.

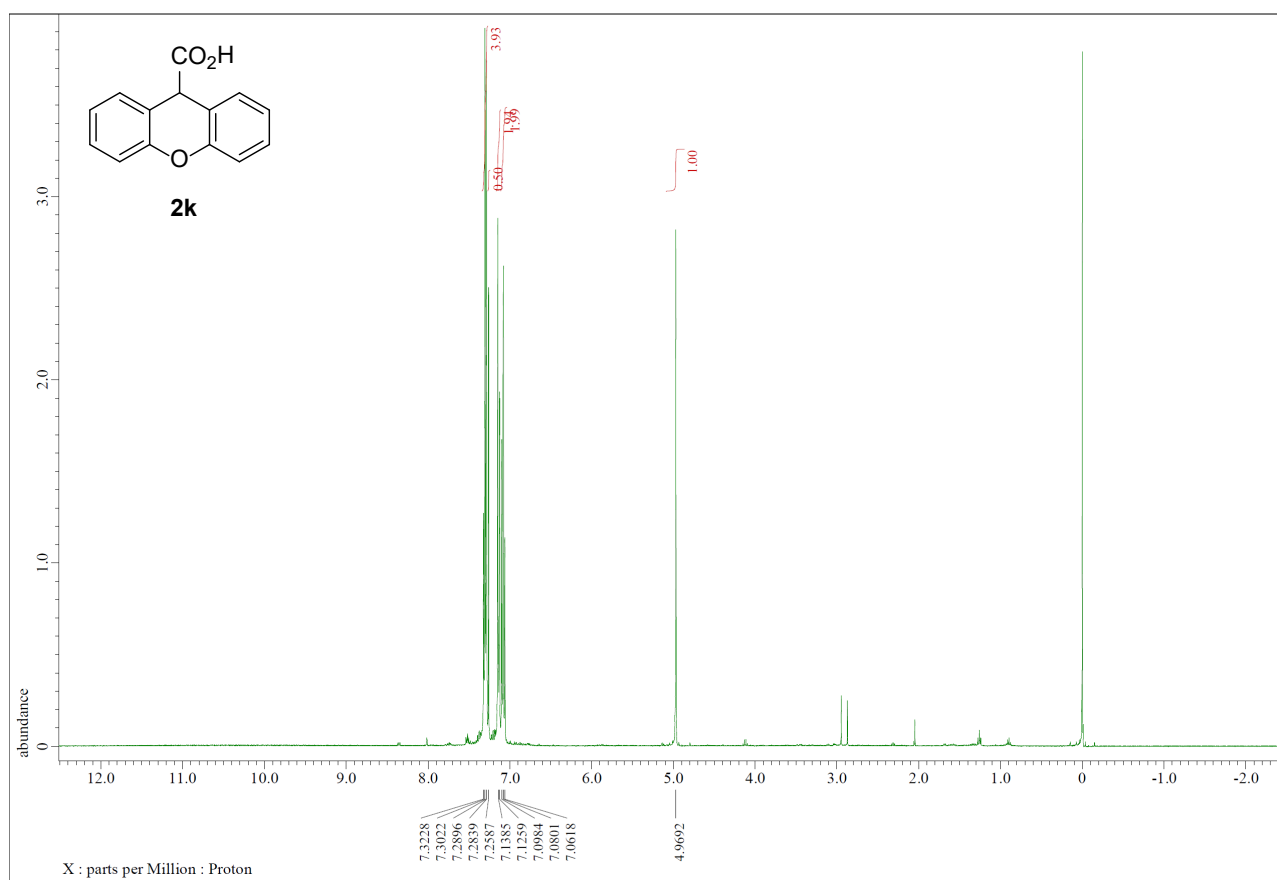

Fig. 17.  $^1\text{H}$  NMR (400 MHz;  $\text{CDCl}_3$ ) spectrum of 9H-xanthene-9-carboxylic acid (**2k**).

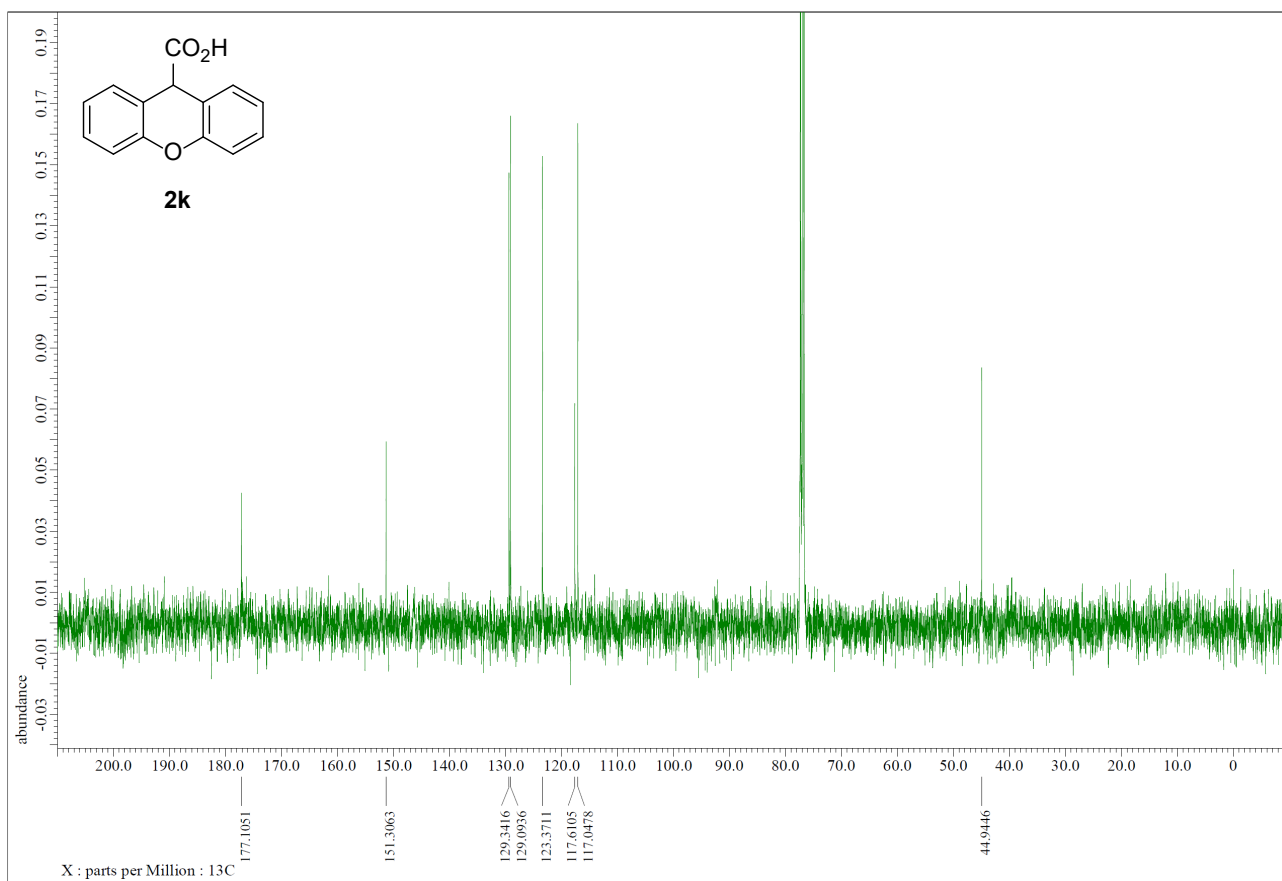

Fig. 18. <sup>13</sup>C NMR (100 MHz; CDCl<sub>3</sub>) spectrum of 9H-xanthene-9-carboxylic acid (**2k**).

10.  $^1\text{H}$  and  $^{13}\text{C}$  spectra of compound **21**.

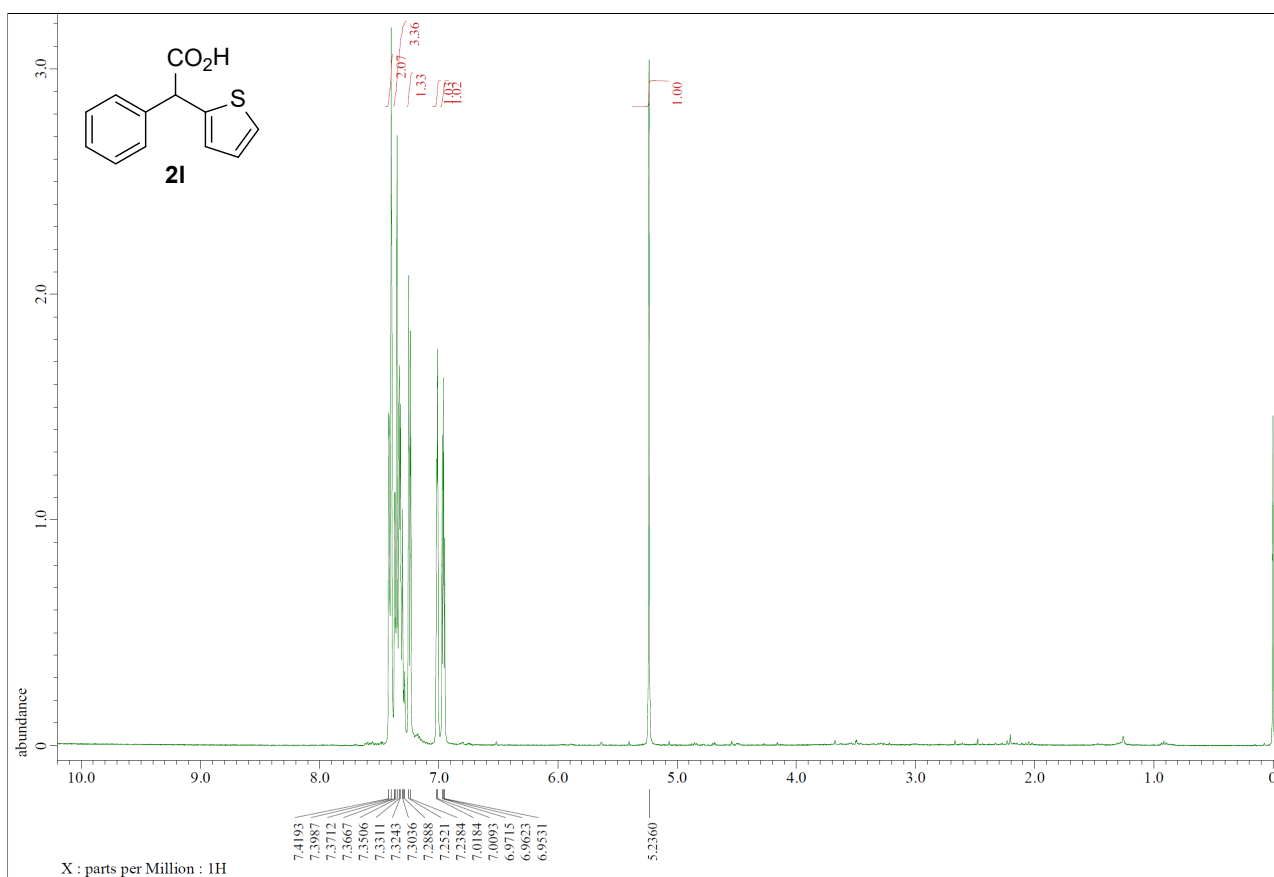

Fig. 19.  $^1\text{H}$  NMR (400 MHz;  $\text{CDCl}_3$ ) spectrum of phenyl(thiophen-2-yl)acetic acid (**21**).

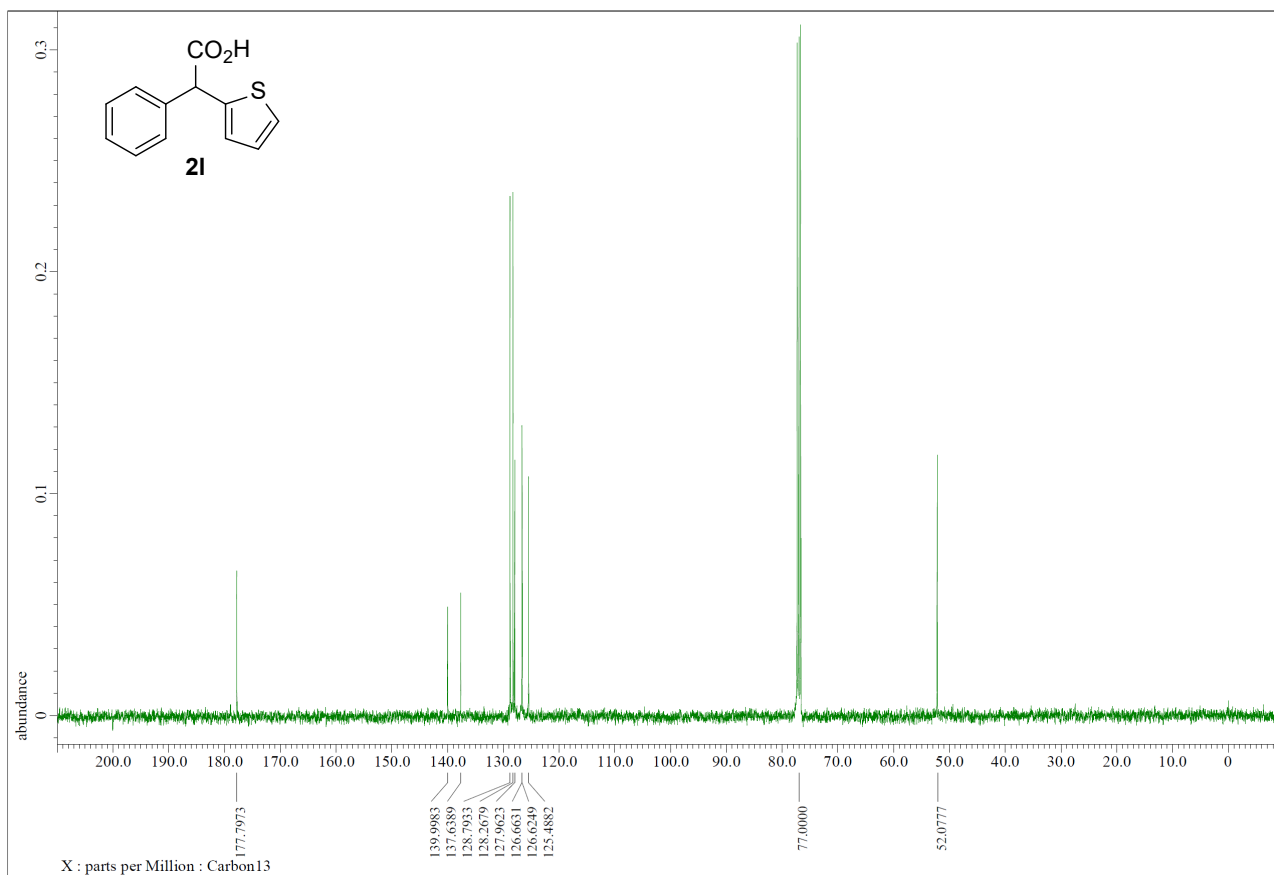

Fig. 20.  $^{13}\text{C}$  NMR (100 MHz;  $\text{CDCl}_3$ ) spectrum of phenyl(thiophen-2-yl)acetic acid (**21**).
